# Supplementary material for: Electrotaxis evokes directional separation of co-cultured keratinocytes and fibroblasts
Source: PubMed Central journal article supplement (PMC10349865; doi:10.1038/s41598-023-38664-y), 2023-07-15
Supplement: 41598_2023_38664_MOESM1_ESM.pdf [file 41598_2023_38664_MOESM1_ESM.pdf]

Table ST1: List of publications related to keratinocyte electrotaxis. PubMed search: "Keratinocytes AND (electrotaxis OR galvanotaxis OR electric field)

|    | Title                                                                                                                                                | Year | Stimulation paradigm | EF in mV/mm                    | Cell type                                                                          | Research type                                                            | Focus                   | Modified parameters                                                       | Reference                                                                                           |
|----|------------------------------------------------------------------------------------------------------------------------------------------------------|------|----------------------|--------------------------------|------------------------------------------------------------------------------------|--------------------------------------------------------------------------|-------------------------|---------------------------------------------------------------------------|-----------------------------------------------------------------------------------------------------|
| 1  | Parting the cellular sea: electrotaxis evoked directional separation of co-cultured keratinocytes and fibroblasts                                    | 2023 | DC                   | 50,100,200,400                 | Human Dermal Fibroblasts                                                           | Cell migration<br>Co-culture with keratinocytes                          | Engineering/<br>Biology | EF strength<br>EF direction<br>Cell Media + co-culture with keratinocytes | This Manuscript                                                                                     |
| 2  | Bioelectronic microfluidic wound healing: a platform for investigating direct current stimulation of injured cell collectives.                       | 2023 | DC                   | 200                            | Primary Human Keratinocytes - monolayer                                            | Wound closure                                                            | Engineering             | EF direction<br>Media composition (diabetes)                              | Lab Chip. 2023 Mar 14;23(6):1531-1546. doi: 10.1039/d2lc01045c.                                     |
| 3  | Engineering diabetic human skin equivalent for in vitro and in vivo applications.                                                                    | 2022 | DC                   | 20, 40                         | Diabetic Keratinocytes & Fibroblasts - engineered tissue                           | Cell activity & proliferation                                            | Engineering             | EF strength                                                               | Front Bioeng Biotechnol. 2022 Sep 30;10:989888. doi:10.3389/fbioe.2022.989888. eCollection 2022.    |
| 4  | Come together: On-chip bioelectric wound closure                                                                                                     | 2021 | DC                   | 200                            | Primary Human Keratinocytes - monolayer                                            | Wound closure                                                            | Engineering             |                                                                           | Biosens Bioelectron. 2021 Nov 15;192:113479. doi: 10.1016/j.bios.2021.113479. Epub 2021 Jul 8.      |
| 5  | Overriding native cell coordination enhances external programming of collective cell migration                                                       | 2021 | DC                   | 200                            | Primary Mouse Keratinocytes - monolayer                                            | Monolayer migration                                                      | Biology                 | Ca2+ concentration<br>Anti-E Cadherin antibody (DECMA)<br>BAPTA           | Proc Natl Acad Sci U S A. 2021 Jul 20;118(29):e2101352118. doi: 10.1073/pnas.2101352118             |
| 6  | SCHPEPDOG: Programming Electric Cues to Dynamically Herd Large-Scale Cell Migration                                                                  | 2020 | DC                   | 200                            | Primary Human Keratinocytes - monolayer                                            | Cell control in EF                                                       | Engineering             | EF direction in X and Y                                                   | Cell Syst. 2020 Jun 24;10(6):506-514.e3. doi: 10.1016/j.cels.2020.05.009. Epub 2020 Jun             |
| 7  | Electric field down-regulates CD9 to promote keratinocytes migration through AMPK pathway.                                                           | 2020 | DC                   | 200                            | HaCaT Keratinocytes - single cells                                                 | EF influence on genetics                                                 | Biology                 | CD9 overexpression                                                        | Int J Med Sci. 2020 Mar 15;17(7):865-873. doi: 10.7150/ijms.42840. eCollection 2020                 |
| 8  | Keratinocyte electrotaxis induced by physiological pulsed direct current electric fields.                                                            | 2019 | Pulsed DC            | 150                            | Primary Mouse Keratinocytes - single cells                                         | EF influence on electrotaxis                                             | Biology                 |                                                                           | Bioelectrochemistry. 2019 Jun;127:113-124. doi: 10.1016/j.bioelechem.2019.02.001. Epub 2019 Feb 14. |
| 9  | Electric field-induced migration and intercellular stress alignment in a collective epithelial monolayer.                                            | 2018 | DC                   | 50                             | HaCaT Keratinocytes - monolayer                                                    | Monolayer migration                                                      | Biology                 | EF directedness                                                           | Mol Biol Cell. 2018 Sep 15;29(19):2292-2302. doi: 10.1091/mbc.E18-01-0077. Epub 2018 Jul 25.        |
| 10 | Electric field-induced suppression of PTEN drives epithelial-to-mesenchymal transition via mTORC1 activation.                                        | 2017 | DC                   | 100                            | Primary Human Keratinocytes - monolayer                                            | Wound closure                                                            | Biology                 | Transfection with PTEN                                                    | J Dermatol Sci. 2017 Feb;85(2):96-105. doi:10.1016/j.jdermsci.2016.11.007. Epub 2016 Nov 18.        |
| 11 | Kindlin-1 Regulates Keratinocyte Electrotaxis.                                                                                                       | 2016 | DC                   | 50, 100, 200                   | Immortalized Human Keratinocytes - FERMT1mutated                                   | Influence of Kindlin 1 on EF sensing                                     | Biology                 | Presence of Kindlin 1                                                     | J Invest Dermatol. 2016 Nov;136(11):2229-2239. doi:10.1016/j.jid.2016.05.129. Epub 2016 Jul 15.     |
| 12 | Spontaneous and electric field-controlled front-rear polarization of human keratinocytes.                                                            | 2015 | DC                   | 100                            | Immortalized Human Keratinocytes - single cells                                    | Cell polarization                                                        | Biology                 | pH<br>Suramin - Suramin, PTX, PPADS, Gallein                              | Mol Biol Cell. 2015 Dec 1;26(24):4373-86. doi: 10.1091/mbc.E14-12-1580. Epub 2015 Sep 30.           |
| 13 | ATP Release and P2 Y Receptor Signaling are Essential for Keratinocyte Galvanotaxis.                                                                 | 2016 | DC                   | 100                            | Primary Human Keratinocytes - single cells                                         | Influence of ATP on EF sensing                                           | Biology                 | Suramin<br>P2Y receptor                                                   | J Cell Physiol. 2016 Jan;231(1):181-91. doi: 10.1002/jcp.25070.                                     |
| 14 | The Galvanotactic Migration of Keratinocytes is Enhanced by Hypoxic Preconditioning.                                                                 | 2015 | DC                   | 25, 50, 100, 200               | Primary Mouse Keratinocytes - single cells + monolayers                            | Influence of Oxygen + EF                                                 | Biology                 | oxygen saturation                                                         | Sci Rep. 2015 May 19;5:10289. doi: 10.1038/srep10289.                                               |
| 15 | Improvement of human keratinocyte migration by a redox active bioelectric dressing.                                                                  | 2014 | DC                   | ≤ 270                          | HaCaT Keratinocytes - monolayer                                                    | Influence of EF on electrotaxis + H2O2                                   | Engineering/<br>Biology | Number of Ag/Zn dots                                                      | PLoS One. 2014 Mar 3;9(3):e82939. doi: 10.1371/journal.pone.0089239. eCollection 2014.              |
| 16 | The epithelial sodium channel mediates the directionality of galvanotaxis in human keratinocytes.                                                    | 2013 | DC                   | 100                            | Human Keratinocytes<br>Mouse Keratinocytes aENaC                                   | Influence of ENaC on EF sensing                                          | Biology                 | Suppression or expression of ENaC                                         | J Cell Sci. 2013 May 1;126(Pt 9):1942-51. doi: 10.1242/jcs.113225. Epub 2013 Feb 27.                |
| 17 | Keratinocyte galvanotaxis in combined DC and AC electric fields supports an electromechanical transduction sensing mechanism.                        | 2013 | DC + AC              | 100 (DC)<br>40 (AC) 1.6,160 Hz | Primary Human Keratinocytes - single cells                                         | Electromechanical sensing of EF                                          | Biology                 | AC frequency + AC-DC superposition                                        | Bioelectromagnetics. 2013 Feb;34(2):85-94. doi: 10.1002/bem.21748. Epub 2012 Aug 21.                |
| 18 | Human keratinocytes respond to direct current stimulation by increasing intracellular calcium: preferential response of poorly differentiated cells. | 2012 | DC                   | 200<br>100,200,400,900         | Primary Human Keratinocytes - monolayer                                            | Influence of EF on intracellular Ca2+                                    | Biology                 | Ca2+ concentration<br>Voltage Gated Ca2+ Channels blockers                | J Cell Physiol. 2012 Jun;227(6):2660-7. doi: 10.1002/jcp.23008.                                     |
| 19 | Electrical signals control wound healing through phosphatidylinositol-3-OH kinase-γ and PTEN                                                         | 2006 | DC                   | 100, 150, 200                  | Primary Mouse Keratinocytes - monolayer<br>Ex vivo cornea cultures                 | Influence of EF on PI3K and PTEN on EF sensign                           | Biology                 |                                                                           | Nature. 2006 Jul 27;442(7101):457-60. doi: 10.1038/nature04925.                                     |
| 20 | beta4 integrin and epidermal growth factor coordinately regulate electric field-mediated directional migration via Rac1.                             | 2006 | DC                   | 100                            | Primary Human Keratinocytes - single cells<br>Keratinocytes lacking beta4 integrin | Influence of beta4 integrin in EF sensing                                | Biology                 | Retroviral transduction to express or not beta 4                          | Mol Biol Cell. 2006 Nov;17(11):4925-35. doi: 10.1091/mbc.e06-05-0433. Epub 2006 Aug 16.             |
| 21 | The Ras/Raf-1/MEK1/ERK signaling pathway coupled to integrin expression mediates cholinergic regulation of keratinocyte directional migration.       | 2005 | DC                   | 100                            | Human Keratinocytes - single cells                                                 | Influence of various signaling pathways on cellular orientation in an EF | Biology                 | Chemotaxis<br>Galvanotropism<br>Activated pathway                         | J Biol Chem. 2005 Nov 25;280(47):39220-8. doi: 10.1074/jbc.M504407200. Epub 2005 Sep 8.             |

|    |                                                                                                                                                |      |    |                      |                                    |                                                                                |            |                                                                                                                      |                                                                                     |
|----|------------------------------------------------------------------------------------------------------------------------------------------------|------|----|----------------------|------------------------------------|--------------------------------------------------------------------------------|------------|----------------------------------------------------------------------------------------------------------------------|-------------------------------------------------------------------------------------|
| 22 | Cyclic AMP mediates keratinocyte directional migration in an electric field.                                                                   | 2005 | DC | 100                  | Human Keratinocytes - single cells | Importance of cyclic AMP on electrotaxis                                       | Biological | AMP agonists / antagonists<br>beta2-AR, sp-cAMP, pertussis toxin, forskolin                                          | J Cell Sci. 2005 May 1;118(Pt 9):2023-34. doi: 10.1242/jcs.02330. Epub 2005 Apr 19. |
| 23 | Calcium channel blockers inhibit galvanotaxis in human keratinocytes.                                                                          | 2002 | DC | 100                  | Human Keratinocytes - single cells | Influence of Ca <sup>2+</sup> in Electrotaxis                                  | Biological | Ca <sup>2+</sup> channel blockers<br>amiloride, verapamil, galdolinium chloride, strontium chloride, nickel chloride | J Cell Physiol. 2002 Oct;193(1):1-9. doi: 10.1002/jcp.10144.                        |
| 24 | Cyclic AMP-dependent protein kinase A plays a role in the directed migration of human keratinocytes in a DC electric field.                    | 2001 | DC | 100                  | Human Keratinocytes - single cells | Influence of cyclic AMP on electrotaxis                                        | Biological | Concentration of kinase inhibitor<br>KTS720, W-7, Sphingosine, GF109203X, ML-7, H-7                                  | Cell Motil Cytoskeleton. 2001 Dec;50(4):207-17. doi: 10.1002/cm.10009.              |
| 25 | Epidermal growth factor receptor relocation and kinase activity are necessary for directional migration of keratinocytes in DC electric fields | 1999 | DC | 100                  | Human Keratinocytes - single cells | Effects of protein tyrosine kinase inhibitors on electrotaxis                  | Biological | Type and concentration of kinase inhibitor<br>PD158780, Genistein, Lavendustin A, Tyrphostin B4                      | J Cell Sci. 1999 Jun;112 ( Pt 12):1967-78. doi: 10.1242/jcs.112.12.1967.            |
| 26 | Involucrin-positive keratinocytes demonstrate decreased migration speed but sustained directional migration in a DC electric field.            | 1999 | DC | 100                  | Human Keratinocytes - single cells | Influence of involucrin expression on EF sensing                               | Biological | Involucrin positive vs negative                                                                                      | J Invest Dermatol. 1999 Nov;113(5):851-855. doi: 10.1046/j.1523-1747.1999.00763.x.  |
| 27 | Migration of human keratinocytes in electric fields requires growth factors and extracellular calcium.                                         | 1998 | DC | 100                  | Human Keratinocytes - single cells | Influence of extracellular Ca <sup>2+</sup> and growth factors on electrotaxis | Biological | Concentration of: HKGS, EGF, Insulin, BPE                                                                            | J Invest Dermatol. 1998 Nov;111(5):751-6. doi: 10.1046/j.1523-1747.1998.00366.x.    |
| 28 | Imposition of a physiologic DC electric field alters the migratory response of human keratinocytes on extracellular matrix molecules.          | 1996 | DC | 100, 400             | Human Keratinocytes - single cells | Influence of extracellular matrix on electrotaxis                              | Biological | Type of substrate coating<br>collagen I, collagen IV, fibronectin, laminin, plastic                                  | J Invest Dermatol. 1996 Apr;106(4):642-6. doi: 10.1111/1523-1747.ep12345456.        |
| 29 | Human keratinocytes migrate to the negative pole in direct current electric fields comparable to those measured in mammalian wounds.           | 1996 | DC | 10,20,50,100,200,400 | Human Keratinocytes - single cells | Influence of EF magnitude on cell migration                                    | Biological | EF magnitude                                                                                                         | J Cell Sci. 1996 Jan;109 ( Pt 1):199-207. doi: 10.1242/jcs.109.1.199.               |

Table ST2: List of publications related to fibroblast electrotaxis. PubMed search: "Dermal Fibroblasts AND (electrotaxis OR galvanotaxis OR electric field)

|    | Title                                                                                                                                            | Year | Stimulation paradigm            | EF in mV/mm         | Cell type                                                                           | Research type                                                   | Focus                   | Modified parameters                                                                              | Reference                                                                                               |
|----|--------------------------------------------------------------------------------------------------------------------------------------------------|------|---------------------------------|---------------------|-------------------------------------------------------------------------------------|-----------------------------------------------------------------|-------------------------|--------------------------------------------------------------------------------------------------|---------------------------------------------------------------------------------------------------------|
| 1  | Parting the cellular sea: electrotaxis evoked directional separation of co-cultured keratinocytes and fibroblasts                                | 2023 | DC                              | 50,100,200,400      | Human Dermal Fibroblasts                                                            | Cell migration<br>Co-culture with keratinocytes                 | Engineering/<br>Biology | EF strength<br>EF direction<br>Cell Media + co-culture with keratinocytes                        | This Manuscript                                                                                         |
| 2  | Pulse Capacitive Coupling Electric Field Regulates Cell Migration, Proliferation, Polarization, and Vascularization to Accelerate Wound Healing. | 2023 | Pulsed capacitive coupling EF   | 54 @ 60Hz           | Human Dermal Fibroblasts<br>Primary Keratinocytes                                   | Cell migration                                                  | Engineering             |                                                                                                  | Adv Wound Care (New Rochelle). 2023 Jan 18. doi: 10.1089/wound.2021.0194. Online ahead of print.        |
| 3  | Electrical Shunting Prevents the Decline of Galvanotaxis After Monophasic Pulsed Microcurrent Stimulation in Human Dermal Fibroblasts.           | 2022 | DC with shunt                   | N/A                 | Primary Human Dermal Fibroblasts                                                    | Cell migration                                                  | Engineering             | Stimulation current<br>+100, 200, 400 µA                                                         | Eplasty, 22, e27.                                                                                       |
| 4  | A pulsed current electric field alters protein expression creating a wound healing phenotype in human skin cells.                                | 2020 | DC Pulsed DC                    | 100<br>50 mA 128 Hz | Human Dermal Fibroblasts<br>Normal Keratinocytes<br>Microvascular Endothelial cells | Cell Migration<br>Cell Proliferation<br>Gene Expression         | Engineering             | DC vs Pulsed DC                                                                                  | Regen Med. 2020 May;15(5):1611-1623. doi: 10.2217/rme-2019-0087. Epub 2020 Jul 7.                       |
| 5  | Monophasic Pulsed 200-µA Current Promotes Galvanotaxis With Polarization of Actin Filament and Integrin α2β1 in Human Dermal Fibroblasts.        | 2016 | Monophasic pulsed micro current | N/A                 | Human Dermal Fibroblasts                                                            | Cell Migration<br>Cell Proliferation                            | Engineering/<br>Biology | Stimulation current<br>+100, 200, 300 µA                                                         | Eplasty. 2016 Jan 19;16:e6. eCollection 2016.                                                           |
| 6  | Golgi polarization plays a role in the directional migration of neonatal dermal fibroblasts induced by the direct current electric fields.       | 2015 | DC                              | 100                 | Human Dermal Fibroblasts                                                            | Cell migration<br>influence of Golgi polarization on EF sensing | Biology                 | Influence of Brefeldin A (BFA)                                                                   | Biochem Biophys Res Commun. 2015 May 1;460(2):255-60. doi: 10.1016/j.bbrc.2015.03.021. Epub 2015 Mar 13 |
| 7  | Correlation between cell migration and reactive oxygen species under electric field stimulation                                                  | 2015 | DC                              | 100, 200, 400       | NIH 3T3 fibroblasts                                                                 | Cell migration<br>influence of ROS                              | Engineering/<br>Biology | EF strength<br>addition of beta-lapachone                                                        | Biomedfluidics. 2015 Oct 6;9(5):054120. doi: 10.1063/1.4932662.                                         |
| 8  | Calcium Ion Flow Permeates Cells through SOCs to Promote Cathode-Directed Galvanotaxis                                                           | 2015 | DC Pulsed DC                    | 500                 | Mouse Dermal Fibroblasts                                                            | Cell Migration<br>Ca <sup>2+</sup> flow                         | Engineering/<br>Biology | Ion flow at different EF strengths<br>Pulse frequency -0.1, 10, 1000 Hz<br>Duty cycle - 50%, 75% | PLoS One. 2015 Oct 8;10(10):e0139865. doi: 10.1371/journal.pone.0139865.                                |
| 9  | Control of neonatal human dermal fibroblast migration on poly(lactic-co-glycolic acid)-coated surfaces by electrotaxis.                          | 2015 | DC                              | 50, 100, 150, 200   | Human Dermal Fibroblasts                                                            | Cell Migration                                                  | Biology                 | Coating of surface with PLGA<br>EF intensity, EF direction                                       | J. Tissue Eng Regen Med. 2017 Mar;11(3):862-868. doi: 10.1002/term.1986. Epub 2015 Jan 28.              |
| 10 | Collaborative effects of electric field and fluid shear stress on fibroblast migration.                                                          | 2013 | DC                              | 50, 100, 200        | Human Dermal Fibroblasts                                                            | Cell Migration                                                  | Engineering             | EF strength<br>Fluid shear velocity                                                              | Lab Chip. 2013 Apr 21;13(8):1602-11. doi: 10.1039/c3lc41240g.                                           |
| 11 | Regeneration and control of human fibroblast cell density by intermittently delivered pulsed electric fields.                                    | 2013 | Pulsed DC                       | 150<br>1 Hz         | Human Dermal Fibroblasts                                                            | Cell Proliferation                                              | Engineering/<br>Biology | Number of stimulation pulses                                                                     | Biotechnol Bioeng. 2013 Jun;110(6):1759-68. doi: 10.1002/bit.24831. Epub 2013 Mar 4.                    |
| 12 | Optimum microcurrent stimulation intensity for galvanotaxis in human fibroblasts.                                                                | 2012 | Monophasic pulsed micro current | N/A                 | Human Dermal Fibroblasts                                                            | Cell Migration                                                  | Engineering/<br>Biology | Stimulation Current<br>+50, 100 µA @ 0.3 Hz, 250 ms                                              | J Wound Care. 2012 Jan;21(1):5-6, 8,10; discussion 10-1. doi: 10.12968/jowc.2012.21.Sup9.S5.            |
| 13 | Effects of physiological electric fields on migration of human dermal fibroblasts.                                                               | 2010 | DC                              | 50, 100, 400        | Human Dermal Fibroblasts<br>Primary Dermal Fibroblasts                              | Cell Migration                                                  | Biology                 | EF strength<br>PI3K inhibition - LY294002                                                        | J Invest Dermatol. 2010 Sep;130(9):2320-7. doi: 10.1038/jid.2010.96. Epub 2010 Apr 22.                  |
| 14 | Human dermal fibroblasts do not exhibit directional migration on collagen I in direct-current electric fields of physiological strength.         | 2003 | DC                              | 100                 | Human Dermal Fibroblasts                                                            | Cell Migration                                                  | Biology                 | Cell media<br>Keratinocyte Media, Serum containing media (SM), High Mg <sup>2+</sup> media (HM)  | Exp Dermatol. 2003 Aug;12(4):396-402. doi: 10.1034/j.1600-0625.2002.120406.x.                           |
| 15 | Electric fields and proliferation in a chronic wound model.                                                                                      | 1996 | AC                              | 0.02 - 1            | Human Dermal Fibroblasts in collagen matrix (3D)                                    | Cell Proliferation<br>DNA changes                               | Biology                 | EF strength<br>frequency - 10, 100 Hz                                                            | Bioelectromagnetics. 1996;17(6):450-7. doi: 10.1002/(SICI)1521-186X(1996)17:6<450::AID-BEM4>3.0.CO;2-2  |
